# Supplementary material for: Development of decision aids for female BRCA1 and BRCA2 mutation carriers in Germany to support preference-sensitive decision-making
Source: PubMed Central journal article supplement (PMC8180100; doi:10.1186/s12911-021-01528-4), 2021-06-05
Supplement: 12911_2021_1528_MOESM2_ESM.pdf [file 12911_2021_1528_MOESM2_ESM.pdf]

**Table 1: Systematic literature research: List of identified decision aids**

| Authors/Developers [Reference]                                                                                                  | Title of the decision aid                                                                                                                                                                                                                                                                                                                         | Year of publication | Country                    | Target group addressed                                                                                                                                                                                               | Cancer risk addressed                   | Basic structural elements                                                                                                                                                                                                                                                                                                                                                                                                                                                                                                                                                                                                                                                                                                                                                                                                                                                                                        | Format                        |  |                     |                                                                                                                                                                                                                                                                                                                                                   |                                   |                                                                                                                                                                    |                                   |                                                                                                                                          |                |
|---------------------------------------------------------------------------------------------------------------------------------|---------------------------------------------------------------------------------------------------------------------------------------------------------------------------------------------------------------------------------------------------------------------------------------------------------------------------------------------------|---------------------|----------------------------|----------------------------------------------------------------------------------------------------------------------------------------------------------------------------------------------------------------------|-----------------------------------------|------------------------------------------------------------------------------------------------------------------------------------------------------------------------------------------------------------------------------------------------------------------------------------------------------------------------------------------------------------------------------------------------------------------------------------------------------------------------------------------------------------------------------------------------------------------------------------------------------------------------------------------------------------------------------------------------------------------------------------------------------------------------------------------------------------------------------------------------------------------------------------------------------------------|-------------------------------|--|---------------------|---------------------------------------------------------------------------------------------------------------------------------------------------------------------------------------------------------------------------------------------------------------------------------------------------------------------------------------------------|-----------------------------------|--------------------------------------------------------------------------------------------------------------------------------------------------------------------|-----------------------------------|------------------------------------------------------------------------------------------------------------------------------------------|----------------|
| Metcalfe K, Narod S, Poll A, O'Connor A. The Centre for Research in Women's Health, Toronto. University of Ottawa. [57]         | What are my options for Breast Cancer Prevention? Facts and Decision Aid for Women with a <i>BRCA1</i> or <i>BRCA2</i> mutation.                                                                                                                                                                                                                  | 2006                | Canada                     | Women with <i>BRCA1/2</i> mutations;<br>• No differentiation between <i>BRCA1</i> and <i>BRCA2</i> mutation.<br>• Addresses not affected by cancer (previvors)                                                       | Breast cancer risk                      | <table border="1"> <tr> <td colspan="2">Target group, target decision</td> </tr> <tr> <td>Medical information</td> <td> <ul style="list-style-type: none"> <li>• Risks due to <i>BRCA1/2</i> mutation</li> <li>• Average morbidity rates for BC/OC</li> <li>• Preventive options for BC</li> <li>• Outcomes and consequences of preventive options</li> <li>• Benefits and risks of preventive options</li> <li>• Fact boxes</li> </ul> </td> </tr> <tr> <td>Tools for decision-making support</td> <td> <ul style="list-style-type: none"> <li>• General information (short)</li> <li>• Step-by-step guide</li> <li>• Clarifying values/preferences</li> </ul> </td> </tr> <tr> <td>Other</td> <td> <ul style="list-style-type: none"> <li>• Glossary</li> <li>• Reference list / further literature</li> </ul> </td> </tr> </table>                                                                            | Target group, target decision |  | Medical information | <ul style="list-style-type: none"> <li>• Risks due to <i>BRCA1/2</i> mutation</li> <li>• Average morbidity rates for BC/OC</li> <li>• Preventive options for BC</li> <li>• Outcomes and consequences of preventive options</li> <li>• Benefits and risks of preventive options</li> <li>• Fact boxes</li> </ul>                                   | Tools for decision-making support | <ul style="list-style-type: none"> <li>• General information (short)</li> <li>• Step-by-step guide</li> <li>• Clarifying values/preferences</li> </ul>             | Other                             | <ul style="list-style-type: none"> <li>• Glossary</li> <li>• Reference list / further literature</li> </ul>                              | Brochure / PDF |
| Target group, target decision                                                                                                   |                                                                                                                                                                                                                                                                                                                                                   |                     |                            |                                                                                                                                                                                                                      |                                         |                                                                                                                                                                                                                                                                                                                                                                                                                                                                                                                                                                                                                                                                                                                                                                                                                                                                                                                  |                               |  |                     |                                                                                                                                                                                                                                                                                                                                                   |                                   |                                                                                                                                                                    |                                   |                                                                                                                                          |                |
| Medical information                                                                                                             | <ul style="list-style-type: none"> <li>• Risks due to <i>BRCA1/2</i> mutation</li> <li>• Average morbidity rates for BC/OC</li> <li>• Preventive options for BC</li> <li>• Outcomes and consequences of preventive options</li> <li>• Benefits and risks of preventive options</li> <li>• Fact boxes</li> </ul>                                   |                     |                            |                                                                                                                                                                                                                      |                                         |                                                                                                                                                                                                                                                                                                                                                                                                                                                                                                                                                                                                                                                                                                                                                                                                                                                                                                                  |                               |  |                     |                                                                                                                                                                                                                                                                                                                                                   |                                   |                                                                                                                                                                    |                                   |                                                                                                                                          |                |
| Tools for decision-making support                                                                                               | <ul style="list-style-type: none"> <li>• General information (short)</li> <li>• Step-by-step guide</li> <li>• Clarifying values/preferences</li> </ul>                                                                                                                                                                                            |                     |                            |                                                                                                                                                                                                                      |                                         |                                                                                                                                                                                                                                                                                                                                                                                                                                                                                                                                                                                                                                                                                                                                                                                                                                                                                                                  |                               |  |                     |                                                                                                                                                                                                                                                                                                                                                   |                                   |                                                                                                                                                                    |                                   |                                                                                                                                          |                |
| Other                                                                                                                           | <ul style="list-style-type: none"> <li>• Glossary</li> <li>• Reference list / further literature</li> </ul>                                                                                                                                                                                                                                       |                     |                            |                                                                                                                                                                                                                      |                                         |                                                                                                                                                                                                                                                                                                                                                                                                                                                                                                                                                                                                                                                                                                                                                                                                                                                                                                                  |                               |  |                     |                                                                                                                                                                                                                                                                                                                                                   |                                   |                                                                                                                                                                    |                                   |                                                                                                                                          |                |
| Kurian AW, Plevetris S. Stanford University School of Medicine. [58]                                                            | Decision tool for women with <i>BRCA</i> Mutations.                                                                                                                                                                                                                                                                                               | 2011                | USA                        | Women with <i>BRCA1/2</i> mutations;<br>• Clear differentiation between <i>BRCA1</i> and <i>BRCA2</i> mutation.<br>• Addresses not affected by cancer (previvors).                                                   | Breast cancer risk, Ovarian cancer risk | <table border="1"> <tr> <td colspan="2">Target group, target decision</td> </tr> <tr> <td>Medical information</td> <td> <ul style="list-style-type: none"> <li>• Risks due to <i>BRCA1/2</i> mutation</li> <li>• Average morbidity rates for BC/OC</li> <li>• Preventive options</li> <li>• Outcomes and consequences of preventive options</li> </ul> </td> </tr> <tr> <td>Other</td> <td> <ul style="list-style-type: none"> <li>• Glossary</li> <li>• Contact addresses and/or internet links</li> <li>• Reference list/further literature</li> </ul> </td> </tr> </table>                                                                                                                                                                                                                                                                                                                                    | Target group, target decision |  | Medical information | <ul style="list-style-type: none"> <li>• Risks due to <i>BRCA1/2</i> mutation</li> <li>• Average morbidity rates for BC/OC</li> <li>• Preventive options</li> <li>• Outcomes and consequences of preventive options</li> </ul>                                                                                                                    | Other                             | <ul style="list-style-type: none"> <li>• Glossary</li> <li>• Contact addresses and/or internet links</li> <li>• Reference list/further literature</li> </ul>       | Online tool for individualisation |                                                                                                                                          |                |
| Target group, target decision                                                                                                   |                                                                                                                                                                                                                                                                                                                                                   |                     |                            |                                                                                                                                                                                                                      |                                         |                                                                                                                                                                                                                                                                                                                                                                                                                                                                                                                                                                                                                                                                                                                                                                                                                                                                                                                  |                               |  |                     |                                                                                                                                                                                                                                                                                                                                                   |                                   |                                                                                                                                                                    |                                   |                                                                                                                                          |                |
| Medical information                                                                                                             | <ul style="list-style-type: none"> <li>• Risks due to <i>BRCA1/2</i> mutation</li> <li>• Average morbidity rates for BC/OC</li> <li>• Preventive options</li> <li>• Outcomes and consequences of preventive options</li> </ul>                                                                                                                    |                     |                            |                                                                                                                                                                                                                      |                                         |                                                                                                                                                                                                                                                                                                                                                                                                                                                                                                                                                                                                                                                                                                                                                                                                                                                                                                                  |                               |  |                     |                                                                                                                                                                                                                                                                                                                                                   |                                   |                                                                                                                                                                    |                                   |                                                                                                                                          |                |
| Other                                                                                                                           | <ul style="list-style-type: none"> <li>• Glossary</li> <li>• Contact addresses and/or internet links</li> <li>• Reference list/further literature</li> </ul>                                                                                                                                                                                      |                     |                            |                                                                                                                                                                                                                      |                                         |                                                                                                                                                                                                                                                                                                                                                                                                                                                                                                                                                                                                                                                                                                                                                                                                                                                                                                                  |                               |  |                     |                                                                                                                                                                                                                                                                                                                                                   |                                   |                                                                                                                                                                    |                                   |                                                                                                                                          |                |
| Hereditary Cancer Clinic, Prince of Wales Hospital, Centre for Genetics Education, NSW Health, Royal North Shore Hospital. [64] | Information for women considering preventive mastectomy because of a strong family history of breast cancer.                                                                                                                                                                                                                                      | 2012                | Australia, New South Wales | Women with a strong family history of breast cancer and<br>• <i>BRCA1/2</i> mutations<br>• Personal history of unilateral breast cancer<br>• Personal history of multiple breast biopsies<br>• Breast cancer anxiety | Breast cancer risk                      | <table border="1"> <tr> <td colspan="2">Target group, target decision</td> </tr> <tr> <td>Medical information</td> <td> <ul style="list-style-type: none"> <li>• Family history of BC</li> <li>• Risks due to <i>BRCA1/2</i> mutation</li> <li>• Example age-/time-related risk of BC</li> <li>• Preventive options</li> <li>• Outcomes and consequences of preventive options</li> <li>• Benefits and risks of preventive options</li> <li>• Personal stories</li> </ul> </td> </tr> <tr> <td>Tools for decision-making support</td> <td> <ul style="list-style-type: none"> <li>• General information (detailed)</li> <li>• Question list addressing medical information/doctor patient dialogue</li> </ul> </td> </tr> <tr> <td>Other</td> <td> <ul style="list-style-type: none"> <li>• Contact addresses and/or internet links</li> <li>• Reference list/further literature</li> </ul> </td> </tr> </table> | Target group, target decision |  | Medical information | <ul style="list-style-type: none"> <li>• Family history of BC</li> <li>• Risks due to <i>BRCA1/2</i> mutation</li> <li>• Example age-/time-related risk of BC</li> <li>• Preventive options</li> <li>• Outcomes and consequences of preventive options</li> <li>• Benefits and risks of preventive options</li> <li>• Personal stories</li> </ul> | Tools for decision-making support | <ul style="list-style-type: none"> <li>• General information (detailed)</li> <li>• Question list addressing medical information/doctor patient dialogue</li> </ul> | Other                             | <ul style="list-style-type: none"> <li>• Contact addresses and/or internet links</li> <li>• Reference list/further literature</li> </ul> | Brochure / PDF |
| Target group, target decision                                                                                                   |                                                                                                                                                                                                                                                                                                                                                   |                     |                            |                                                                                                                                                                                                                      |                                         |                                                                                                                                                                                                                                                                                                                                                                                                                                                                                                                                                                                                                                                                                                                                                                                                                                                                                                                  |                               |  |                     |                                                                                                                                                                                                                                                                                                                                                   |                                   |                                                                                                                                                                    |                                   |                                                                                                                                          |                |
| Medical information                                                                                                             | <ul style="list-style-type: none"> <li>• Family history of BC</li> <li>• Risks due to <i>BRCA1/2</i> mutation</li> <li>• Example age-/time-related risk of BC</li> <li>• Preventive options</li> <li>• Outcomes and consequences of preventive options</li> <li>• Benefits and risks of preventive options</li> <li>• Personal stories</li> </ul> |                     |                            |                                                                                                                                                                                                                      |                                         |                                                                                                                                                                                                                                                                                                                                                                                                                                                                                                                                                                                                                                                                                                                                                                                                                                                                                                                  |                               |  |                     |                                                                                                                                                                                                                                                                                                                                                   |                                   |                                                                                                                                                                    |                                   |                                                                                                                                          |                |
| Tools for decision-making support                                                                                               | <ul style="list-style-type: none"> <li>• General information (detailed)</li> <li>• Question list addressing medical information/doctor patient dialogue</li> </ul>                                                                                                                                                                                |                     |                            |                                                                                                                                                                                                                      |                                         |                                                                                                                                                                                                                                                                                                                                                                                                                                                                                                                                                                                                                                                                                                                                                                                                                                                                                                                  |                               |  |                     |                                                                                                                                                                                                                                                                                                                                                   |                                   |                                                                                                                                                                    |                                   |                                                                                                                                          |                |
| Other                                                                                                                           | <ul style="list-style-type: none"> <li>• Contact addresses and/or internet links</li> <li>• Reference list/further literature</li> </ul>                                                                                                                                                                                                          |                     |                            |                                                                                                                                                                                                                      |                                         |                                                                                                                                                                                                                                                                                                                                                                                                                                                                                                                                                                                                                                                                                                                                                                                                                                                                                                                  |                               |  |                     |                                                                                                                                                                                                                                                                                                                                                   |                                   |                                                                                                                                                                    |                                   |                                                                                                                                          |                |

| Authors/Developers [Reference] | Title of the decision aid                                                   | Year of publication | Country   | Target group addressed                                                                                                                                                                                                                                                                                                                                               | Cancer risk addressed | Basic structural elements         | Format                                                                                                                                     |                                                                                                                                                                                                                                                                                                                                                                                                                                                   |
|--------------------------------|-----------------------------------------------------------------------------|---------------------|-----------|----------------------------------------------------------------------------------------------------------------------------------------------------------------------------------------------------------------------------------------------------------------------------------------------------------------------------------------------------------------------|-----------------------|-----------------------------------|--------------------------------------------------------------------------------------------------------------------------------------------|---------------------------------------------------------------------------------------------------------------------------------------------------------------------------------------------------------------------------------------------------------------------------------------------------------------------------------------------------------------------------------------------------------------------------------------------------|
| Healthwise Cancer Clinic. [61] | Breast Cancer: What Should I Do if I'm at High Risk?                        | 2016*               | USA       | Women at high risk for breast cancer with <ul style="list-style-type: none"> <li>• Family history of breast cancer</li> <li>• <i>BRCA1/2</i> mutations</li> </ul>                                                                                                                                                                                                    | Breast cancer risk    | Target group, target decision     | Online text                                                                                                                                |                                                                                                                                                                                                                                                                                                                                                                                                                                                   |
|                                |                                                                             |                     |           |                                                                                                                                                                                                                                                                                                                                                                      |                       | Medical information               |                                                                                                                                            | <ul style="list-style-type: none"> <li>• Family history of BC</li> <li>• Risks due to <i>BRCA1/2</i> mutation</li> <li>• Average morbidity rates for BC</li> <li>• Preventive options</li> <li>• Outcomes and consequences of preventive options</li> <li>• Benefits and risks of preventive options</li> <li>• Personal stories</li> <li>• Fact boxes</li> </ul>                                                                                 |
|                                |                                                                             |                     |           |                                                                                                                                                                                                                                                                                                                                                                      |                       | Tools for decision-making support |                                                                                                                                            | <ul style="list-style-type: none"> <li>• Clarifying values/preferences</li> </ul>                                                                                                                                                                                                                                                                                                                                                                 |
|                                |                                                                             |                     |           |                                                                                                                                                                                                                                                                                                                                                                      |                       | Other                             | <ul style="list-style-type: none"> <li>• Reference list / further literature</li> </ul>                                                    |                                                                                                                                                                                                                                                                                                                                                                                                                                                   |
| Mayo Clinic Staff. [59]        | Preventive (prophylactic) mastectomy: Surgery to reduce breast cancer risk. | 2016*               | USA       | Women at increased risk for breast cancer with <ul style="list-style-type: none"> <li>• Personal history of unilateral breast cancer</li> <li>• Family history of breast cancer</li> <li>• <i>BRCA1/2</i> mutations</li> <li>• Personal history of LCIS</li> <li>• Personal history of radiotherapy at the age of 10 to 30</li> <li>• Dense breast tissue</li> </ul> | Breast cancer risk    | Target group, target decision     | Online text on website                                                                                                                     |                                                                                                                                                                                                                                                                                                                                                                                                                                                   |
|                                |                                                                             |                     |           |                                                                                                                                                                                                                                                                                                                                                                      |                       | Medical information               |                                                                                                                                            | <ul style="list-style-type: none"> <li>• Family history of BC</li> <li>• Preventive options</li> <li>• Benefits and risks of preventive options</li> </ul>                                                                                                                                                                                                                                                                                        |
|                                |                                                                             |                     |           |                                                                                                                                                                                                                                                                                                                                                                      |                       | Other                             |                                                                                                                                            | <ul style="list-style-type: none"> <li>• Reference list / further literature</li> </ul>                                                                                                                                                                                                                                                                                                                                                           |
| Cardiff University. [62, 63]   | OVDex. Oophorectomy - Decision Explorer.                                    | 2014                | UK, Wales | Women at increased risk of ovarian cancer with <ul style="list-style-type: none"> <li>• <i>BRCA1</i> or <i>BRCA2</i> mutations</li> <li>• Being from a Lynch syndrome family</li> <li>• No genetic test</li> <li>• Uninformative genetic test</li> <li>• Negative genetic test</li> </ul>                                                                            | Ovarian cancer risk   | Target group, target decision     | Online tool for individualisation                                                                                                          |                                                                                                                                                                                                                                                                                                                                                                                                                                                   |
|                                |                                                                             |                     |           |                                                                                                                                                                                                                                                                                                                                                                      |                       | Medical information               |                                                                                                                                            | <ul style="list-style-type: none"> <li>• Family history of OC</li> <li>• Risks due to <i>BRCA1/2</i> mutation</li> <li>• Average morbidity rates for OC</li> <li>• Preventive options</li> <li>• Outcomes and consequences of preventive options</li> <li>• Benefits and risks of preventive options</li> <li>• Hormone replacement therapy to counteract potential undesired effects of risk-reducing bilateral salpingo-oophorectomy</li> </ul> |
|                                |                                                                             |                     |           |                                                                                                                                                                                                                                                                                                                                                                      |                       | Tools for decision-making support |                                                                                                                                            | <ul style="list-style-type: none"> <li>• Step-by-step guide</li> <li>• Clarifying values/preferences</li> </ul>                                                                                                                                                                                                                                                                                                                                   |
|                                |                                                                             |                     |           |                                                                                                                                                                                                                                                                                                                                                                      |                       | Other                             | <ul style="list-style-type: none"> <li>• Contact addresses and/or internet links</li> <li>• Reference list / further literature</li> </ul> |                                                                                                                                                                                                                                                                                                                                                                                                                                                   |

| Authors/Developers<br>[Reference] | Title of<br>the decision aid                                                                 | Year of<br>publication | Country | Target group<br>addressed                                                                                                                                                                                                                                                       | Cancer risk<br>addressed | Basic structural elements                   | Format                                                                                  |                                                                                                                                                                                                                                                                                                                                                                                                                          |
|-----------------------------------|----------------------------------------------------------------------------------------------|------------------------|---------|---------------------------------------------------------------------------------------------------------------------------------------------------------------------------------------------------------------------------------------------------------------------------------|--------------------------|---------------------------------------------|-----------------------------------------------------------------------------------------|--------------------------------------------------------------------------------------------------------------------------------------------------------------------------------------------------------------------------------------------------------------------------------------------------------------------------------------------------------------------------------------------------------------------------|
| Mayo Clinic Staff.<br>[60]        | Prophylactic<br>oophorectomy:<br>Preventing cancer by<br>surgically removing<br>your ovaries | 2014*                  | USA     | Women at increased risk<br>of ovarian cancer with<br>• <i>BRCA1</i> or <i>BRCA2</i><br>mutations<br>• Strong family history of<br>breast cancer and ovarian<br>cancer without known<br>genetic alteration<br>• Strong likelihood of<br>gene mutation, but no<br>genetic testing | Ovarian cancer<br>risk   | Target group, target decision               | Online<br>text                                                                          |                                                                                                                                                                                                                                                                                                                                                                                                                          |
|                                   |                                                                                              |                        |         |                                                                                                                                                                                                                                                                                 |                          | Medical<br>information                      |                                                                                         | <ul style="list-style-type: none"> <li>• Family history of OC</li> <li>• Risks due to <i>BRCA1/2</i> mutation</li> <li>• Preventive options</li> <li>• Outcomes and consequences of<br/>preventive options</li> <li>• Benefits and risks of preventive options</li> <li>• Hormone replacement therapy to<br/>counteract potential undesired effects of<br/>risk-reducing bilateral salpingo-<br/>oophorectomy</li> </ul> |
|                                   |                                                                                              |                        |         |                                                                                                                                                                                                                                                                                 |                          | Tools for<br>decision-<br>making<br>support |                                                                                         | <ul style="list-style-type: none"> <li>• Question list addressing medical<br/>information/doctor patient dialogue</li> </ul>                                                                                                                                                                                                                                                                                             |
|                                   |                                                                                              |                        |         |                                                                                                                                                                                                                                                                                 |                          | Other                                       | <ul style="list-style-type: none"> <li>• Reference list / further literature</li> </ul> |                                                                                                                                                                                                                                                                                                                                                                                                                          |

\* a current version dated 2019 is available

**Table 2: Systematic literature research: Evaluation of the identified decision aids with regard to the given target definitions**

|                                    |                                                                                                                                                                                                                                                                                                                                                   | Requirements of target definitions met? |                         |                                           |                       |                         |                                   |                        |
|------------------------------------|---------------------------------------------------------------------------------------------------------------------------------------------------------------------------------------------------------------------------------------------------------------------------------------------------------------------------------------------------|-----------------------------------------|-------------------------|-------------------------------------------|-----------------------|-------------------------|-----------------------------------|------------------------|
| Target                             | Target definition                                                                                                                                                                                                                                                                                                                                 | Metcalfe, 2006 [57]                     | Kurian, 2011 [58]       | Hereditary Cancer Clinic et al, 2012 [64] | Healthwise, 2016 [61] | Mayo Clinic, 2016 [59]  | Cardiff University, 2014 [62, 63] | Mayo Clinic, 2014 [60] |
| Target group                       | The DA should be designed for female previvors and survivors with pathogenic <i>BRCA1</i> or <i>BRCA2</i> mutations.                                                                                                                                                                                                                              | partly met                              | partly met              | partly met                                | partly met            | partly met              | partly met                        | partly met             |
| Target decision                    | The addressed decision situation should be the choice of an individual preventive strategy.                                                                                                                                                                                                                                                       | met                                     | met                     | met                                       | met                   | met                     | met                               | met                    |
| Decision-making-related target     | The DA should help previvors and survivors make informed decisions and clarify their individual values and preferences.                                                                                                                                                                                                                           | partly met                              | partly met <sup>1</sup> | partly met                                | partly met            | partly met <sup>1</sup> | partly met                        | partly met             |
| Information/content-related target | The DA should address the risks of breast cancer and ovarian cancer and present the respective preventive options, including their consequences. Existing data on lifetime and on age and time-related risks should be taken into account in order to facilitate the women's risk perception within a foreseeable period of time.                 | partly met                              | partly met              | partly met                                | partly met            | partly met              | partly met                        | partly met             |
| Needs-related target               | The DA should fulfil the specific needs of the target group.                                                                                                                                                                                                                                                                                      | met                                     | partly met              | partly met                                | partly met            | partly met              | partly met                        | partly met             |
| Evidence-related target            | The medical content should be based on the currently applicable German S3 and S2 guidelines <sup>2</sup> and, where necessary, on additional data with a high level of evidence; [preferably data with an expected level of evidence of IIb and higher (e.g. systematic reviews based on RCTs, meta-analyses, RCTs, high quality cohort studies)] | not met <sup>3</sup>                    | not met <sup>3</sup>    | not met <sup>3</sup>                      | not met <sup>3</sup>  | not met <sup>3</sup>    | not met <sup>3</sup>              | not met <sup>3</sup>   |

DA: decision aid; <sup>1</sup>DA does not contain any tool for supporting decision making; <sup>2</sup>the German S3 guidelines represent the evidence-based consensus in Germany at the highest quality level of methodological development; <sup>3</sup>none of the DAs used the German S3 guidelines as a basis.
