# Supplementary material for: Development of decision aids for female BRCA1 and BRCA2 mutation carriers in Germany to support preference-sensitive decision-making
Source: PubMed Central journal article supplement (PMC8180100; doi:10.1186/s12911-021-01528-4), 2021-06-05
Supplement: 12911_2021_1528_MOESM3_ESM.pdf [file 12911_2021_1528_MOESM3_ESM.pdf]

**Table 1: Characteristics of the focus group participants**

| Criterion                                                            | Target group   |               |
|----------------------------------------------------------------------|----------------|---------------|
|                                                                      | Previvors      | Survivors     |
| <b>Total number (n)</b>                                              | 9              | 10            |
| <b>Medium age [range] (years)</b>                                    | 41,1 [27-53]   | 45,6 [27-56]  |
| <b>Gene test result</b>                                              |                |               |
| <i>BRCA1</i> mutation (n)                                            | 6              | 8             |
| <i>BRCA2</i> mutation (n)                                            | 3              | 1             |
| <i>BRCA1 and BRCA2</i> mutation (n)                                  | 0              | 1             |
| Genetic test result received [range] (months ago)                    | 7,5 [4-15]     | 30 [4-156]    |
| <b>History of breast cancer</b>                                      |                |               |
| Individuals with one breast cancer (n)                               | not applicable | 5             |
| Individuals with more than one breast cancer (n)                     | not applicable | 5             |
| Therapeutic surgery: breast-conserving (n of breasts)                | not applicable | 10            |
| Therapeutic surgery: mastectomy (n of breasts)                       | not applicable | 4             |
| Therapeutic surgery: not specified (n of breasts)                    | not applicable | 1             |
| <b>Preventive measures taken - breast cancer</b>                     |                |               |
| Intensified breast cancer screening (n)                              | 3              | 3             |
| Risk-reducing mastectomy (n)                                         | 4              | 4             |
| - With breast reconstruction (n)                                     | 4              | 4             |
| - Without breast reconstruction (n)                                  | 0              | 0             |
| <b>Preventive measures planned - breast cancer</b>                   |                |               |
| Intensified breast cancer screening (n)                              | 2              | 1             |
| Risk-reducing mastectomy definitely planned (n)                      | 0              | 0             |
| Considering risk-reducing mastectomy (n)                             | 3              | 1             |
| Definitely no risk-reducing mastectomy (n)                           | 2              | 0             |
| <b>Preventive measures taken - ovarian cancer</b>                    |                |               |
| Risk-reducing bilateral salpingo-oophorectomy (n)                    | 4              | 6             |
| <b>Preventive measures planned - ovarian cancer</b>                  |                |               |
| Risk-reducing bilateral salpingo-oophorectomy definitely planned (n) | 3              | 2             |
| Considering risk-reducing salpingo-oophorectomy (n)                  | 0              | 1             |
| <b>Other</b>                                                         |                |               |
| Currently no further planning (n)                                    | 1              | 1             |
| Planning not specified / not applicable (n)                          | 1              | 3             |
| <b>Family history of breast and/or ovarian cancer</b>                |                |               |
| Yes (n)                                                              | 9              | 4             |
| No (n)                                                               | 0              | 3             |
| Not specified / not applicable (n)                                   | 0              | 3             |
| <b>Family planning</b>                                               |                |               |
| Completed / has own children (n)                                     | 7              | not specified |
| Not completed / has childbearing preferences (n)                     | 2              | not specified |

**Table 2: Basic results of the focus group discussions with previvors and survivors**

| Focus group discussions      | Topic                             | Basic results                                                                                                                                                                                                                                                                                                                                                                                                                                                                                                                                                                                                                                                                                                                                              |
|------------------------------|-----------------------------------|------------------------------------------------------------------------------------------------------------------------------------------------------------------------------------------------------------------------------------------------------------------------------------------------------------------------------------------------------------------------------------------------------------------------------------------------------------------------------------------------------------------------------------------------------------------------------------------------------------------------------------------------------------------------------------------------------------------------------------------------------------|
| <b>With previvors (n=9)</b>  | General impression                | <ul style="list-style-type: none"> <li>• Highly positive to the DA overall.</li> <li>• High, but suitable level, most of the information is well explained and comprehensible.</li> </ul>                                                                                                                                                                                                                                                                                                                                                                                                                                                                                                                                                                  |
|                              | Beneficial aspects                | <ul style="list-style-type: none"> <li>• Information in detail compiled in one medium, of a suitable level; makes it possible to delve deeper into certain topics.</li> <li>• Detailed information especially on mutations, risks, risk-reducing breast surgery.</li> <li>• Integrated overview tables and fact boxes.</li> <li>• Worksheets for comparing the options and establishing values.</li> <li>• Integrated glossary.</li> </ul>                                                                                                                                                                                                                                                                                                                 |
|                              | Aspects to add, delete, or change | <ul style="list-style-type: none"> <li>• To clarify that the mutation should be acknowledged a stress factor, even though not having cancer.</li> <li>• To address positive and negative consequences of the options.</li> <li>• To change the sections for clarifying values in the worksheets from box ticking to free-form notes to formulate own thoughts.</li> <li>• To present personal testimonies.<sup>1</sup></li> <li>• To integrate photos of genuine breast surgery results.<sup>2</sup></li> </ul>                                                                                                                                                                                                                                            |
|                              | Specific needs                    | <ul style="list-style-type: none"> <li>• More information on the consequences of risk-reducing salpingo-oophorectomy (e.g. loss of fertility, hormone replacement therapy, adverse effects).</li> <li>• More information on the various procedures for risk-reducing breast surgeries and the procedure following the operation (e.g. stay in the clinic, duration of recovery).</li> <li>• More psychological aspects.</li> </ul>                                                                                                                                                                                                                                                                                                                         |
| <b>With survivors (n=10)</b> | General impression                | <ul style="list-style-type: none"> <li>• Positive response to the DA overall.</li> </ul>                                                                                                                                                                                                                                                                                                                                                                                                                                                                                                                                                                                                                                                                   |
|                              | Beneficial aspects                | <ul style="list-style-type: none"> <li>• Information in detail compiled in one medium; makes it possible to delve deeper into certain topics.</li> <li>• Comprehensive information, especially on breast surgery and reconstruction.</li> <li>• Worksheets for comparing the options and establishing values.</li> </ul>                                                                                                                                                                                                                                                                                                                                                                                                                                   |
|                              | Aspects to add, delete, or change | <ul style="list-style-type: none"> <li>• To make certain sections more precise and comprehensible.</li> <li>• To handle breast cancer self-examination as an important topic.</li> <li>• To change the sections for clarifying values in the worksheets from box ticking to free-form notes to formulate own thoughts.</li> <li>• To integrate summary boxes at the end of each chapter.</li> <li>• To integrate photos of genuine breast surgery results.<sup>2</sup></li> </ul>                                                                                                                                                                                                                                                                          |
|                              | Specific needs                    | <ul style="list-style-type: none"> <li>• More information on the first breast cancer on the already affected side: biochemical parameters, therapy of the first breast cancer including surgery, radiotherapy, medical therapy (anti-hormonal, anti-growth receptor, chemotherapy), risk of recurrence on the affected side.</li> <li>• More information on the procedure following the various breast surgeries (e.g. stay in the clinic, duration of recovery), breast reconstruction, and symmetry following contralateral mastectomy of the opposite side.</li> <li>• More information on the consequences of risk-reducing salpingo-oophorectomy.</li> <li>• More information on the intensified breast screening and aftercare programme.</li> </ul> |

<sup>1</sup>Personal testimonies were not included due to the lack of evidence for their benefits and their potential to cloud a person's judgement [66]. <sup>2</sup>Photos of genuine breast surgery results were not provided for liability reasons.
