# Supplementary material for: Development of decision aids for female BRCA1 and BRCA2 mutation carriers in Germany to support preference-sensitive decision-making
Source: PubMed Central journal article supplement (PMC8180100; doi:10.1186/s12911-021-01528-4), 2021-06-05
Supplement: 12911_2021_1528_MOESM4_ESM.pdf [file 12911_2021_1528_MOESM4_ESM.pdf]

**Table 1: Basic results of the user tests with previvors (n=6) for DA A**

| <b>(a) DA A Acceptability criteria</b>                       | <b>Assessment</b>                           | <b>(n)</b> |
|--------------------------------------------------------------|---------------------------------------------|------------|
| General impression, spontaneous assessment                   | Positive                                    | 6          |
|                                                              | Partly positive/Partly negative             | 0          |
|                                                              | Negative                                    | 0          |
| Scope of the DA (length)                                     | Just right                                  | 6          |
|                                                              | Too long                                    | 0          |
|                                                              | Too short                                   | 0          |
| Amount of information                                        | Just right                                  | 4          |
|                                                              | Too much                                    | 0          |
|                                                              | Partly too little                           | 2          |
|                                                              | Too little                                  | 0          |
| Balanced presentation of the options                         | Well balanced                               | 6          |
|                                                              | Unbalanced                                  | 0          |
| Comprehensibility                                            | Easy to understand                          | 3          |
|                                                              | Partly good /partly difficult to understand | 3          |
|                                                              | Difficult to understand                     | 0          |
| Usefulness in terms of decision making                       | High                                        | 6          |
|                                                              | Moderate                                    | 0          |
|                                                              | Low                                         | 0          |
| Satisfaction with the DA                                     | High                                        | 6          |
|                                                              | Moderate                                    | 0          |
|                                                              | Low                                         | 0          |
| Sufficient information for decision making                   | Yes                                         | 6          |
|                                                              | No                                          | 0          |
|                                                              | I don't know                                | 0          |
| Would you recommend the DA to other women in your situation? | Yes                                         | 6          |
|                                                              | No                                          | 0          |
|                                                              | I don't know                                | 0          |

| <b>(b) DA A Content</b>                                                          | <b>Adjustments after user testing</b>                        |
|----------------------------------------------------------------------------------|--------------------------------------------------------------|
| Introduction                                                                     | Minor adjustments: additional information                    |
| 1. Overview                                                                      | No adjustments                                               |
| 2.1 Information on mutations in the genes <i>BRCA1</i> or <i>BRCA2</i>           | Minor adjustments: Revision of some of the explanatory texts |
| 2.2 Information on the risks of developing breast and ovarian cancer             | No adjustments                                               |
| 3.1 Preventive option: Intensified breast cancer screening                       | Adjustments: Revision of two figures with legends            |
| 3.2 Preventive option: Risk-reducing bilateral mastectomy                        | Minor adjustments: additional information                    |
| Forms of breast reconstruction                                                   | Minor adjustments: Revision of some of the explanatory texts |
| 3.3 Preventive option: Risk-reducing removal of both ovaries and Fallopian tubes | No adjustments                                               |
| 4. Worksheets 1 to 4 for support of decision-making                              | Minor adjustments in Worksheets 2, 3 and 4                   |
| 5. Further information                                                           | Minor adjustments: additional information                    |
| 6. Appendix: Fact boxes                                                          | No adjustments                                               |

**Table 2: Basic results of the user tests with survivors (n=5) for DA B**

| <b>(a) DA B Acceptability criteria</b>                                      | <b>Assessment</b>                           | <b>(n)</b> |
|-----------------------------------------------------------------------------|---------------------------------------------|------------|
| General impression, spontaneous assessment                                  | Positive                                    | 4          |
|                                                                             | Partly positive/Partly negative             | 1          |
|                                                                             | Negative                                    | 0          |
| Scope of the DA (length)                                                    | Just right                                  | 4          |
|                                                                             | Too much                                    | (1*)       |
|                                                                             | Too short                                   | 0          |
|                                                                             | Not specified**                             | 1          |
| Amount of information                                                       | Just right                                  | 3          |
|                                                                             | Too much                                    | 2          |
|                                                                             | Too little                                  | 0          |
| Balanced presentation of the options for the healthy breast (opposite side) | Well balanced                               | 5          |
|                                                                             | Unbalanced                                  | 0          |
| Balanced presentation of the option for both ovaries and Fallopian tubes    | Well balanced                               | 3          |
|                                                                             | Not well balanced                           | 1          |
|                                                                             | I don't know                                | 0          |
|                                                                             | Not specified**                             | 1          |
| Comprehensibility                                                           | Easy to understand                          | 4          |
|                                                                             | Partly good /partly difficult to understand | 1          |
|                                                                             | Difficult to understand                     | 0          |
| Usefulness in terms of decision making                                      | High                                        | 5          |
|                                                                             | Moderate                                    | 0          |
|                                                                             | Low                                         | 0          |
| Satisfaction with the DA                                                    | High                                        | 4          |
|                                                                             | Moderate                                    | 1          |
|                                                                             | Low                                         | 0          |
| Sufficient information for decision making                                  | Yes                                         | 4          |
|                                                                             | No                                          | 0          |
|                                                                             | I don't know                                | 0          |
|                                                                             | Not specified                               | 1          |
| Would you recommend the DA to other women in your situation?                | Yes                                         | 5          |
|                                                                             | No                                          | 0          |
|                                                                             | I don't know                                | 0          |

\*additional comment from n=1 on assessment for women receiving chemotherapy \*\*one participant did not answer

| <b>(b) DA B Content</b>                                                                                                                                                                     | <b>Adjustments after user test</b>   |
|---------------------------------------------------------------------------------------------------------------------------------------------------------------------------------------------|--------------------------------------|
| Introduction                                                                                                                                                                                | Minor adjustments: language revision |
| 2. Overview                                                                                                                                                                                 | No adjustments                       |
| 2.2 Information on mutations in the genes <i>BRCA1</i> or <i>BRCA2</i>                                                                                                                      | Adjustment: Addition of a summary    |
| 2.2 Information on the risks of developing breast cancer in the healthy breast (opposite side) and of developing ovarian cancer; Information on the risk of recurrence on the affected side | No adjustments                       |
| 3. Information on diagnosis and treatment of breast cancer (already affected side)                                                                                                          | Adjustments: Addition of a summary   |
| 4.1 Preventive option: Intensified breast cancer screening and aftercare of the breast                                                                                                      | Minor adjustments: language revision |
| 4.2 Preventive option: Risk-reducing removal of the healthy breast (opposite side)                                                                                                          | Minor adjustments: text completion   |
| Forms of breast reconstruction                                                                                                                                                              | No adjustments                       |
| 4.3 Preventive option: Risk-reducing removal of both ovaries and Fallopian tubes                                                                                                            | Minor adjustments: text completion   |
| 5. Worksheets 1 to 4 for support of decision-making                                                                                                                                         | Minor adjustments: Worksheet 2       |
| 6. Further information                                                                                                                                                                      | No adjustments                       |
| 7. Appendix: fact boxes                                                                                                                                                                     | No adjustments                       |

**Table 3: Interview guideline for the user test of beta version of decision aid A for previvors and decision aid B for survivors.**

**(Part 1) General impression / acceptability (closed questions)**

First, I would like to know what your general impression is of the decision aid. I will now ask you some questions. Please answer questions using the answers provided. However, please feel also free to comment on each point individually.

- 1** First, I would like to hear from you spontaneously what your general impression of the decision aid is. What would you like to tell me spontaneously? (free answer)  
How would you rate your general impression?

- Positive impression  
 Partly positive / Partly negative impression  
 Negative impression

- 2** Now come some specific questions. How do you rate the scope of the decision aid?

The decision aid

- Is too long  
 Is too short  
 Has exactly the right length

- 3** How do you rate the amount of information?

The decision aid contains

- Too much information  
 Too little information  
 Exactly the right amount of information

- 4** How balanced are the options for action "intensified breast cancer screening" and "risk-reducing surgeries"?

The options for action are

- Presented in a balanced way  
 Unbalanced, in favour of intensified breast cancer screening  
 Unbalanced, in favour of risk-reducing surgeries

- 5** How comprehensible is the information?

The information in this decision aid is

- Easy to understand  
 Partly good, partly difficult to understand  
 Difficult to understand

- 6** How would you rate the benefit of the decision aid to make a definite decision for a preventive option?

I rate the benefit as

- high  
 moderate  
 low

7 How satisfied are you with this decision aid?

- Very satisfied/satisfied
- Moderately satisfied
- Dissatisfied/very dissatisfied

8 Do you think that the decision aid provides enough information to enable women with *BRCA1/2* mutations to find a well-suited decision for a preventive option?

- Yes
- No
- I don't know

9 Would you recommend this decision aid to other women in your situation?

- Yes
- No
- I don't know

Questionnaire of Part 1 adapted from: [55] O'Connor AM, Cranney A. *User Manual - Acceptability*. 1996, updated 2002. Ottawa Hospital Research Institute, Ottawa, Canada. [//decisionaid.ohri.ca/docs/develop/User\\_Manuals/UM\\_Acceptability.pdf](http://decisionaid.ohri.ca/docs/develop/User_Manuals/UM_Acceptability.pdf). Accessed 7 March 2017; and [56] Metcalfe KA, Poll A, O'Connor A, Gershman S, Armel S, Finch A, Demsky R, Rosen B, Narod SA. *Development and testing of a decision aid for breast cancer prevention for women with a BRCA1 or BRCA2 mutation*. *Clin Genet*. 2007;72:208-17.

Note: The main aim is for each test reader to completely answer the questions in part 1 on acceptability. The aspects of parts 2 to 4 should also be covered as completely as possible, but only to the extent that each test reader is willing to comment on them in each case.

### **(Part 2 for DA A) Impressions on the contents of the decision aid A (free comments)**

Now I would like to hear your opinion on certain topics in this decision aid. Please feel free to comment on any topics that you would like to share with us.

- 1 Chapter 1: Overview
- 2 Chapter 2.1: Information on mutations in the genes *BRCA1* and *BRCA2*
- 3 Chapter 2.2: Information on the risks of breast and ovarian cancer.
- 4 Chapter 3.1: Preventive option: Intensified breast cancer screening
- 5 Chapter 3.2: Preventive option: Risk-reducing bilateral mastectomy  
Forms of breast reconstruction
- 6 Chapter 3.3: Preventive option: Risk-reducing removal of both ovaries and Fallopian tubes
- 7 Chapter 3.4: Frequent Questions and answers
- 8 Chapter 5: Further information
- 9 Appendix: Fact boxes

**(Part 2 for DA B) Impressions on the contents of the decision aid B (free comments)**

Now I would like to hear your opinion on certain topics in this decision aid. Please feel free to comment on any topics that you would like to share with us.

- 1 Chapter 1: Overview
- 2 Chapter 2.1: Information on mutations in the genes *BRCA1* and *BRCA2*
- 3 Chapter 2.2: Information on the risks of contralateral breast cancer in the healthy breast (opposite side) and the risks of ovarian cancer.
- 4 Chapter 2.3: Information on the individual risk of breast cancer recurrence in the affected side
- 5 Chapter 3: Information on diagnosis and treatment of breast cancer (already affected side)
- 6 Chapter 4.1: Preventive option: Intensified breast cancer screening and aftercare of the breast
- 7 Chapter 4.2: Preventive option: Risk-reducing contralateral mastectomy  
Forms of breast reconstruction
- 8 Chapter 4.3: Preventive option: Risk-reducing removal of both ovaries and Fallopian tubes
- 9 Chapter 4.4: Frequent Questions and answers
- 10 Chapter 5: Further information
- 11 Appendix: Fact boxes

**(Part 3) Questions on the work sheets 1 to 4 or free comments (closed questions or free comments)**

In the following, I am interested on how you would rate worksheets 1 to 4 in chapter 4. If you wish, please answer the following questions, but you are also welcome to answer freely.

- 1 How would you rate worksheet 1:  
"Comparison of the different prevention measures for women with *BRCA1/2* mutation"

Work sheet 1 is

- useful
- not useful

- 2 How would you rate worksheet 2:  
"What aspects are important to me in terms of my cancer risk?"

Work sheet 2 provides

- Good support to get clarity about how to deal with the risks of cancer
- No support in getting clarity about how to deal with the risks of cancer

**3** How would you rate worksheet 3:  
"Step by step to the decision - creating free notes"

Work sheet 3

- Helps to make a decision
- Makes it difficult to make a decision
- Does not help to make a decision

**4** How would you rate work sheet 4:  
"Aids to prepare for the doctor's consultation"

Work sheet

- Helps well in preparing for the doctor-patient interview.
- Does not help to prepare for the doctor-patient interview.

**(Part 4) What else is important to you? (free comments)**

Do you have any more comments on the decision aid that you would like to share with us?  
Criticisms? Praise? Suggestions?
